## RESEARCH ARTICLE

# Temporal trends in overweight and obesity and chronic disease risks among adolescents and young adults: A ten-year review at a tertiary institution in Nigeria

Abayomi Olabayo Oluwasanu<sup>1\*</sup>, Joshua Odunayo Akinyemi<sup>2</sup>, Mojisola Morenike Oluwasanu<sup>3</sup>, Olabisi Bada Oseghe<sup>1</sup>, Olusola Lanre Oladoyinbo<sup>1</sup>, Jelili Bello<sup>1</sup>, Ademola Johnson Ajuwon<sup>3</sup>, Ayodele Samuel Jegede<sup>4</sup>, Goodarz Danaei<sup>5</sup>, Olufemi Akingbola<sup>1</sup>

**1** University Health Services, University of Ibadan, Ibadan, Nigeria, **2** Department of Epidemiology and Medical Statistics, Faculty of Public Health, College of Medicine, University of Ibadan, Ibadan, Nigeria, **3** Department of Health Promotion and Education, Faculty of Public Health, College of Medicine University of Ibadan, Ibadan, Nigeria, **4** Department of Sociology, Faculty of the Social Sciences, University of Ibadan, Ibadan, Nigeria, **5** Department of Global Health and Population, Harvard T. Chan School of Public Health, Harvard University, Boston, Massachusetts, United States of America

\* [bayofayemi2002@yahoo.com](mailto:bayofayemi2002@yahoo.com), [bayooluwasanu21@gmail.com](mailto:bayooluwasanu21@gmail.com)

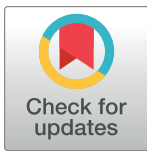

## OPEN ACCESS

**Citation:** Oluwasanu AO, Akinyemi JO, Oluwasanu MM, Oseghe OB, Oladoyinbo OL, Bello J, et al. (2023) Temporal trends in overweight and obesity and chronic disease risks among adolescents and young adults: A ten-year review at a tertiary institution in Nigeria. PLoS ONE 18(4): e0283210. <https://doi.org/10.1371/journal.pone.0283210>

**Editor:** Haris Khurram, National University of Computer and Emerging Sciences, PAKISTAN

**Received:** March 18, 2022

**Accepted:** March 4, 2023

**Published:** April 5, 2023

**Peer Review History:** PLOS recognizes the benefits of transparency in the peer review process; therefore, we enable the publication of all of the content of peer review and author responses alongside final, published articles. The editorial history of this article is available here: <https://doi.org/10.1371/journal.pone.0283210>

**Copyright:** This is an open access article, free of all copyright, and may be freely reproduced, distributed, transmitted, modified, built upon, or otherwise used by anyone for any lawful purpose. The work is made available under the [Creative Commons CC0](https://creativecommons.org/licenses/by/4.0/) public domain dedication.

**Data Availability Statement:** The study is a retrospective review of medical records with no contact with human subjects. The data analysed in

## Abstract

There is an increasing prevalence of obesity among college/university students in low- and middle-income countries, similar to the trend observed in high-income countries. This study aimed to describe the trend and burden of overweight/obesity and emerging associated chronic disease risks among students at the University of Ibadan (UI), Nigeria. This is a ten-year retrospective review of medical records of students (undergraduate and post-graduate) admitted between 2009 and 2018 at UI. Records of 60,168 participants were analysed. The Body Mass Index (BMI) categories were determined according to WHO standard definitions, and blood pressure was classified according to the Seventh Report of the Joint National Committee on Prevention, Detection, Evaluation and Treatment of High Blood Pressure (JNC7). The mean age of the participants was 24.8, SD 8.4 years. The majority were  $\leq 40$  years (95.1%). There was a slight male preponderance (51.5%) with a male-to-female ratio of 1.1:1; undergraduate students constituted 51.9%. The prevalence of underweight, overweight, and obesity were 10.5%, 18.7% and 7.2%, respectively. We found a significant association between overweight/obesity and older age, being female and undergoing post-graduate study ( $p = 0.001$ ). Furthermore, females had a higher burden of coexisting abnormal BMI characterised by underweight (11.7%), overweight (20.2%) and obese (10.4%). Hypertension was the most prevalent obesity-associated non-communicable disease in the study population, with a prevalence of 8.1%. Also, a third of the study population (35.1%) had prehypertension. Hypertension was significantly associated with older age, male sex, overweight/obesity and family history of hypertension ( $p = 0.001$ ). This study identified a higher prevalence of overweight and obesity than underweight among the participants, a double burden of malnutrition and the emergence of non-communicable disease risks with potential lifelong implications on their health and the healthcare system. To address these

the study is from a third party, the University Health Services (UHS), University of Ibadan and usage was approved by the Social Sciences and Humanities Research Ethics Committee (SSHREC), University of Ibadan, Nigeria [UI/SSHEC/2020/0021]. Data cannot be shared publicly because of the legal and ethical restrictions involving hospital records and patient information. However, data may be made available with the permission of UHS management through the Director (contact: [dir\\_uhs@mail1.ui.edu.ng](mailto:dir_uhs@mail1.ui.edu.ng), [ronkejav@yahoo.com](mailto:ronkejav@yahoo.com)) following a reasonable request by researchers who meet the criteria for access to confidential data after appropriate protocol submission to SSHREC (contact via: [as.jegede@mail.ui.edu.ng](mailto:as.jegede@mail.ui.edu.ng), [sayjegede@gmail.com](mailto:sayjegede@gmail.com), referring to the UI/SSHEC/2020/0021).

**Funding:** AOO received financial support for capacity building and the conduct of this study from the office of the 12th Vice-Chancellor, University of Ibadan, Nigeria. None of the co-authors received any financial benefit for the conduct of the study. The Management of the University of Ibadan had no role in study design, data collection and analysis, decision to publish, or manuscript preparation.

**Competing interests:** The authors have declared that no competing interests exist.

issues, cost-effective interventions are urgently needed at secondary and tertiary-level educational institutions.

## Introduction

Over the past two decades, dramatic increases have occurred globally in the prevalence of obesity in both children and adults [1, 2]. The prevalence of obesity in children and young adults has steadily increased to an epidemic proportion in high-income nations. The same trend is being observed in Low- and Middle-Income Countries (LMIC) [3–5]. The increasing trend of overweight and obesity among children and young adults, especially college/university students, is becoming alarming. In the USA and UK, the prevalence of being overweight or obese among young adults ranges from 22 to 35% [6–8]. Similarly, among university students in LMIC, the prevalence of overweight/obesity is reported to be 10–20.7% in Nigeria [9, 10], 10.8–24% in South Africa [11, 12], 11–37.5% in India [13, 14] and 20–30% in Malaysia [15, 16].

Of great concern is that once established, childhood and adolescent obesity status conferred markedly heightened risks for overweight and obesity in adulthood [17, 18]. The rising prevalence of overweight and obesity and lack of physical activity contributes to increased risks of various chronic diseases in young adults with greater severity in adulthood. Studies show that risk factors for metabolic syndrome are more prevalent among overweight or obese children and young adults than among those with healthy weight [19, 20]. Obesity in childhood or adolescence is associated with a higher risk of adult hypertension, coronary heart disease, and stroke [21]. Thus, overweight and obesity in adolescents and young adults have important public health implications, not just about its increasing prevalence but because of possible long-term associations with future weight status and related morbidity. There is a concern that overweight/obesity and associated chronic diseases such as hypertension, cardiovascular disease (CVD) and diabetes are fast emerging as the most prevalent non-communicable diseases (NCDs) in LMIC, prematurely affecting adolescents and younger adults. Also, while diseases associated with undernutrition are still a major issue, LMICs are experiencing a marked increase in overweight and obesity associated with the rising burden of NCDs.

The causes of excess weight gain in the young are similar to those in adults. However, the young are significantly prone to obesity due to changes during the transition from childhood/adolescence to adulthood [22], accompanied by the peculiar and significant lifestyle changes that occur at the time of leaving home for university or college education [23, 24]. The interaction of social, psychological and biological factors during these transition years, added to the pervading obesogenic environment, making them vulnerable to many risk-taking behaviours [25–27]. The transition to independence of college students, the competing academic demands in the presence of unhealthful lifestyle options and existing environments that greatly favour high energy intake and low energy expenditure provide the complex mix that may perpetuate the obesity trajectory on the campuses [28].

The period of stay of adolescents and young adults in the university offers many opportunities for relevant longitudinal studies to guide prevention and treatment services regarding obesity and associated chronic diseases. However, adolescents and young adults are overlooked mainly due to the perception that they are at low risk of developing chronic diseases. There are limited data to show the temporal trends in the transition pattern and prevalence of overweight/obesity among university students in Nigeria and other countries in Africa.

Furthermore, unlike substance abuse and mental health issues, many college and university leaders view helping overweight and obese students as outside the purview of higher education [28]. All these may explain why there have not been any recorded obesity prevention interventions in developing countries for this age group [29]. This study aimed to identify and describe the burden of overweight/obesity and chronic disease risks among adolescents and young adults at the University of Ibadan (UI), Nigeria, in order to lay the foundation for a sustainable plan that promotes optimal weight management and future research in obesity prevention and intervention in the institution.

## Materials and methods

### Study design

The study was a ten-year retrospective review of medical records of students (undergraduate and post-graduate) admitted into UI between 2009 and 2018. The study participants consisted of adolescents and young adults enrolled as freshmen for undergraduate studies and those who had returned or were enrolled for postgraduate studies in the institution. The medical record review utilised the data of students admitted for each new academic year under review. It consisted of data from the routine medical screening done at inception as part of their admission processes and the follow-up information on the treatment and care received for any obesity-related diseases at the University Health Services (UHS). In this study, adolescents and young adults were classified as 16 to 40 years of age, while those above 40 years and  $\leq 65$  years were classified as adults (middle age and older adults).

### Study setting

UI was established in 1948 and is located five miles (8 kilometres) from the centre of Ibadan city in Southwestern Nigeria. It runs academic programmes in sixteen Faculties and other academic units, including the Institutes of Child Health, Education, and African Studies. UI is the premier university and the flagship of postgraduate study in Nigeria. It has a unique status and recruitment policy that covers and offers admission to eligible students from all the states and regions of Nigeria. Also, UI is host to the Pan African University (PAU) which is a Continental initiative of the African Union Commission (AUC). PAU commenced officially in 2011 and has five Institutes located in the five sub-regions of Africa. Pan African University for Life and Earth Sciences Institute (including Health and Agriculture), PAULESI is located in UI and is designed to run only postgraduate programmes.

### Study population

A total sample consisting of all the medical records of students during the period in review was extracted. Specifically, all the health records of the newly admitted undergraduate (from secondary schools in Nigeria) and postgraduate students during the ten years of review (2009–2018) were used for this study. Some of the postgraduate students were former UI students who had completed their undergraduate studies and returned for postgraduate admission and had medical screening repeated during the period of this study. Also, the study participants included postgraduate students admitted from other tertiary institutions in Nigeria and those from member states of the African Union through the Pan-African University for Life and Earth Sciences Institute (including Health and Agriculture), PAULESI. UI offered admission to an average of 3,500 undergraduate students from secondary schools and 3,000 postgraduate students yearly during the period in review. Therefore, a total sample of approximately 60,168 medical records with complete information was used for this study.

## Data collection

Each academic year, new students admitted for undergraduate and postgraduate programmes are required to register at UHS as part of the admission process and for their medical care during their stay at UI. The UHS employs structured questionnaires to collect pre-admission health information, including the students' socio-demographic characteristics and background medical (personal and family) history. Physical examination and measurements including pulse rate, blood pressure (BP), height, weight and BMI were also carried out. Weight was measured to the nearest 0.1 kg using a digital scale. Height was measured to the nearest 0.1 cm with a portable stadiometer while the individual stood barefoot on the centre of the base with their back to the stadiometer. The BMI was calculated as body weight (kg) divided by squared height (m<sup>2</sup>). The BMI was then classified into four categories: underweight (BMI < 18.5), normal weight (BMI 18.5–24.9), overweight (BMI 25.0–29.9) and obesity (BMI ≥ 30) [30]. Blood pressure was measured using a mercury sphygmomanometer based on the recommended standards [31] and classified according to JNC 7 [32]. Chest x-ray and urinalysis were carried out as part of the initial medical evaluation. All these and the records of subsequent visits by each student to the clinic were documented in their medical files. Information about diagnosis and treatment for obesity-related diseases such as hypertension, diabetes, dyslipidemia, asthma, and gall stones were extracted and reviewed retrospectively. Also, the results of relevant investigations such as Electrocardiography (ECG) and lipid profile were reviewed, where available.

The medical records were extracted by trained Research assistants using a standardised excel tool from June to October 2020. The outcome variables of interest were underweight, overweight and obesity, and the covariates were age, sex, background medical (personal and family) history of the students (hypertension, diabetes, asthma, medications), treatment records for obesity-related diseases such as *hypertension, diabetes, dyslipidemia, asthma, gall stones and cancers*.

## Data analysis

The data were entered and cleaned using SPSS 21. Numerical variables such as age, weight, height and blood pressure were summarised using mean (SD), while frequencies/percentages were used for categorical variables. The prevalence of underweight, overweight and obesity and their trends during the period in review were determined. The association between the students' sociodemographic characteristics, hypertension and overweight/obesity was assessed using Chi-square ( $\chi^2$ ) at a 5% significance level. The factors associated with obesity/overweight and hypertension were evaluated using a multivariable binary logit model. Measures of association were reported as Odds Ratio with a 95% Confidence Interval (95% CI).

## Ethical consideration

This is a retrospective medical record review only with no contact with human subjects. Permission to access the data was obtained from the Management of the University of Ibadan Health Services. The Social Sciences and Humanities Research Ethics Committee (SSHREC), University of Ibadan, Nigeria, provided ethical approval for this study [UI/SSHEC/2020/0021]. The study was conducted following the National Code of Health Research Ethics, Nigeria, in accordance with the Declaration of Helsinki guidelines. All data were fully anonymized before accessing them. The information extracted from the medical records was recorded without identifiers and kept confidential. The SSHREC waived the need for informed consent for the study.

**Table 1. Socio-demographic characteristics of students in each year of entry at the University of Ibadan from 2009–2018.**

| Variables                | Overall (%)  | 2009 (%)    | 2010 (%)    | 2011 (%)    | 2012 (%)    | 2013 (%)    | 2014 (%)    | 2015 (%)    | 2016 (%)    | 2017 (%)    | 2018 (%)    |
|--------------------------|--------------|-------------|-------------|-------------|-------------|-------------|-------------|-------------|-------------|-------------|-------------|
|                          | n = 59732    | n = 5739    | n = 6726    | n = 6630    | n = 7288    | n = 5949    | n = 5146    | n = 6314    | n = 5259    | n = 4860    | n = 5821    |
| <b>Age-group (years)</b> |              |             |             |             |             |             |             |             |             |             |             |
| 16–20                    | 23460 (39.3) | 2002 (34.9) | 2234 (33.1) | 1839 (27.8) | 1817 (24.9) | 2084 (34.9) | 2303 (43.9) | 2693 (42.8) | 2621 (49.8) | 2741 (56.4) | 3126 (53.7) |
| 21–25                    | 14646 (24.5) | 1359 (23.7) | 1446 (21.5) | 1151 (17.4) | 1630 (22.4) | 1693 (28.4) | 1272 (24.7) | 1979 (31.3) | 1476 (28.1) | 1255 (25.8) | 1385 (23.8) |
| 26–30                    | 11460 (19.2) | 1083 (18.8) | 1512 (22.5) | 1842 (27.7) | 1965 (26.9) | 1213 (20.5) | 870 (16.9)  | 975 (15.4)  | 731 (13.9)  | 494 (10.2)  | 775 (13.3)  |
| 31–35                    | 4687 (7.9)   | 576 (10.1)  | 645 (9.6)   | 836 (12.6)  | 834 (11.4)  | 455 (7.7)   | 358 (7.0)   | 342 (5.4)   | 206 (3.9)   | 161 (3.3)   | 274 (4.7)   |
| 36–40                    | 2625 (4.4)   | 366 (6.4)   | 442 (6.6)   | 436 (6.6)   | 489 (6.7)   | 240 (4.1)   | 165 (3.2)   | 155 (2.5)   | 117 (2.2)   | 102 (2.1)   | 113 (1.9)   |
| 41+                      | 2854 (4.8)   | 353 (6.2)   | 447 (6.7)   | 526 (6.7)   | 553 (7.6)   | 264 (4.4)   | 178 (3.5)   | 170 (2.7)   | 108 (2.1)   | 107 (2.2)   | 148 (2.5)   |
| <b>Sex</b>               |              |             |             |             |             |             |             |             |             |             |             |
| Male                     | 30768 (51.5) | 3011 (52.5) | 3597 (53.5) | 3563 (53.7) | 4057 (55.7) | 3106 (52.2) | 2625 (51.0) | 3146 (49.8) | 2410 (45.8) | 2394 (49.3) | 2859 (49.1) |
| Female                   | 28964 (48.5) | 2728 (47.5) | 3129 (45.5) | 3067 (46.3) | 3231 (44.3) | 2843 (47.8) | 2521 (49.0) | 3168 (50.2) | 2849 (54.2) | 2466 (50.7) | 2962 (50.9) |
| <b>Programme</b>         |              |             |             |             |             |             |             |             |             |             |             |
| Undergraduate            | 31022 (51.9) | 3057 (53.3) | 3289 (48.8) | 2369 (35.7) | 2437 (33.6) | 2969 (49.9) | 3049 (59.3) | 3500 (55.4) | 3220 (61.2) | 3312 (68.2) | 3820 (65.6) |
| Postgraduates            | 28710 (48.1) | 2682 (46.7) | 3437 (51.1) | 4261 (64.3) | 4851 (66.6) | 2980 (50.1) | 2097 (40.8) | 2814 (44.6) | 2039 (38.8) | 1548 (31.8) | 2001 (34.4) |

<https://doi.org/10.1371/journal.pone.0283210.t001>

## Results

### Background characteristics

Table 1 shows the trends in socio-demographic characteristics (age group, sex, programme mode (undergraduate or postgraduate), BMI and hypertension) of students between 2009 and 2018. The majority were  $\leq 40$  years (95.1%). Students aged 16–20 years constituted over a third of the study population. In addition, the percentage of participants aged 16–20 years increased steadily from 34.9% in 2013 to 53.8% in 2018, while those aged 36–40 years declined from 4.1% to 1.9%. The sex distribution favoured males between 2009 (51.5%) and 2011 (53.7%), but this was reversed such that males constituted less than 50% since 2015. Overall, undergraduate students constituted 51.9% of the entire sample. However, there were some variations over time, with the lowest value in 2011 (35.8%) and the highest in 2017 (68.1%) and 2018 (65.8%).

### Anthropometrics and hypertension profile

Overall, 10.5% of students were underweight [see Table 2]. On the one hand, there was a rising trend in the percentage of participants who were underweight between 2009 and 2017 [Table 2]. The prevalence of overweight and obesity was 18.7% and 7.2%, respectively (Table 2). Over time, the overweight prevalence ranged between 23.0% in 2009 and 16.2% in

**Table 2. BMI and hypertension prevalence at each year of entry of students admitted to the University of Ibadan 2009–2018.**

| Variables           | Overall (%)  | 2009 n (%)       | 2010 n (%)       | 2011 n (%)       | 2012 n (%)       | 2013 n (%)       | 2014 n (%)       | 2015 n (%)       | 2016 n (%)       | 2017 n (%)       | 2018 n (%)       |
|---------------------|--------------|------------------|------------------|------------------|------------------|------------------|------------------|------------------|------------------|------------------|------------------|
| <b>BMI</b>          |              |                  |                  |                  |                  |                  |                  |                  |                  |                  |                  |
| Underweight         | 6311 (10.5)  | 331 (5.8)        | 584 (8.7)        | 598 (9.0)        | 563 (7.7)        | 659 (11.1)       | 692 (13.2)       | 905 (14.2)       | 627 (11.9)       | 751 (15.5)       | 619 (10.6)       |
| Normal              | 38038 (63.5) | 3527 (62.1)      | 4339 (64.4)      | 3919 (59.1)      | 4468 (61.2)      | 3953 (66.0)      | 3466 (66.2)      | 3866 (60.7)      | 3581 (68.2)      | 3240 (66.7)      | 3877 (66.5)      |
| Overweight          | 11186 (18.7) | 1304 (23.0)      | 1313 (19.4)      | 1464 (22.1)      | 1599 (21.9)      | 993 (16.7)       | 817 (15.6)       | 1127 (17.7)      | 772 (14.7)       | 652 (13.4)       | 945 (16.2)       |
| Obese               | 4339 (7.2)   | 517 (9.1)        | 506 (7.5)        | 649 (9.8)        | 672 (9.2)        | 375 (6.3)        | 260 (5.0)        | 470 (7.4)        | 272 (5.2)        | 216 (4.4)        | 385 (6.6)        |
| Mean $\pm$ SD       |              | 23.76 $\pm$ 4.40 | 23.20 $\pm$ 4.40 | 23.61 $\pm$ 4.65 | 23.61 $\pm$ 4.41 | 22.70 $\pm$ 4.19 | 22.34 $\pm$ 4.09 | 22.34 $\pm$ 6.07 | 22.42 $\pm$ 5.32 | 21.94 $\pm$ 3.99 | 22.68 $\pm$ 4.40 |
| <b>Hypertension</b> |              |                  |                  |                  |                  |                  |                  |                  |                  |                  |                  |
| Yes                 | 4851 (8.1)   | 476 (8.3)        | 556 (8.3)        | 624 (9.4)        | 419 (5.7)        | 483 (8.1)        | 441 (8.6)        | 723 (11.5)       | 444 (8.5)        | 362 (7.4)        | 323 (5.5)        |
| No                  | 54894 (91.9) | 5273 (91.7)      | 6170 (91.7)      | 6005 (90.6)      | 6874 (94.3)      | 5465 (91.9)      | 4706 (91.4)      | 5589 (88.5)      | 4809 (91.5)      | 4503 (92.6)      | 5498 (94.5)      |

<https://doi.org/10.1371/journal.pone.0283210.t002>

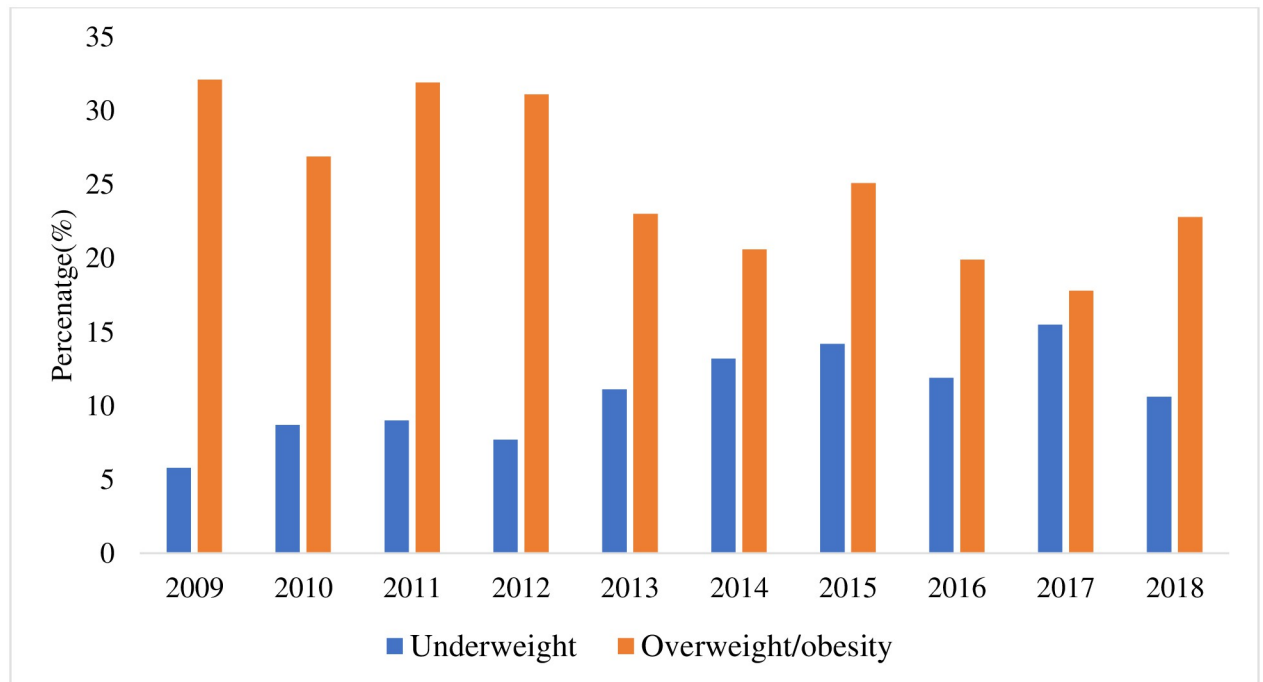

**Fig 1. Trends in the prevalence of underweight and overweight/obesity (overnutrition) across each year of admission between 2009 and 2018.**

<https://doi.org/10.1371/journal.pone.0283210.g001>

2018. Similarly, the percentage of obese individuals ranged between 9.1% in 2009 and 6.6% in 2018 [Table 2]. There was a dip in the percentages of both overweight and obese students in 2014, 2016 and 2017. On the other hand, except for 2017, there was a consistently higher prevalence of overweight than underweight in each year of admission, and a shift from underweight to overnutrition (overweight and obesity) across each year of admission into the University [Table 2, Fig 1]. Regarding sex distribution, there were more underweight, overweight, and obese females than males [Fig 2].

The prevalence of hypertension based on systolic (140) and diastolic (90) blood pressure cut-off at enrolment was 8.1%. The level seems to be on a downward trend from 2015 (11.4%) to 2018 (5.5%) [Table 2].

### Medical history and obesity-related health conditions

Table 3 shows the students' medical history and obesity-related health conditions or disease profiles. Over the ten years, hypertension was the most prevalent non-communicable disease, followed by asthma. Thirty-five per cent of the study population had prehypertension, defined as systolic pressure from 120 to 139mmHg or a diastolic pressure from 80 to 89mmHg. About 2.2% of the study population had multiple risk factors for hypertension. The multiple risk factors identified in the data include age, male sex, family history of hypertension, overweight and obesity. Other rare but associated diseases include diabetes, dyslipidemia, osteoarthritis and gallstone. There was no record of cancer diagnosis. The result shows that 5.6% of those diagnosed with hypertension had Electrocardiography (ECG) done as part of their evaluation. About 75% of the ECG results revealed Left Ventricular Hypertrophy (LVH). In terms of intervention, only about a tenth (10.9%) of those who met the criteria for a hypertension diagnosis had follow-up treatment records. On the other hand, almost all the study participants diagnosed with asthma (97.9%) and diabetes (91.7%) had follow-up treatment records.

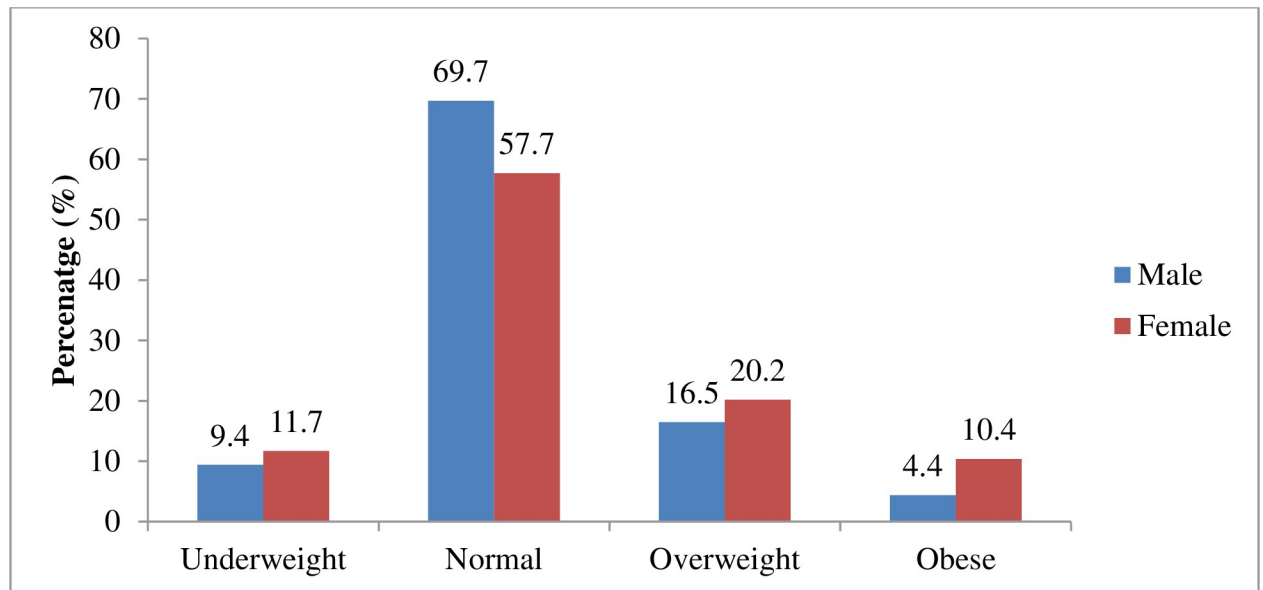

**Fig 2. BMI categories according to the sex of students in the University of Ibadan.**

<https://doi.org/10.1371/journal.pone.0283210.g002>

### Association between the socio-demographic characteristics of the students and overweight/obesity

There was a significant association between age and overweight/obesity (Table 4). The percentage of students that were overweight or obese increased as age increased. There was also a significant association between gender and being overweight or obese, with more female students being overweight or obese (30.9%) than male students (21.2%). More postgraduate students were overweight or obese (37.8%) than undergraduates (15.0%).

The factors identified to be significantly related to overweight/obesity were also subjected to multivariate analysis, and the results are presented in Table 5. The likelihood of overweight/obesity increased with age. For instance, students aged 36–40 years (OR = 5.27) and 41 years and above (OR = 8.96) were more likely than those aged 16–20 years to be overweight/obese. The odds of being overweight/obese were significantly higher among females than males and postgraduate students [Table 5].

### Association between the socio-demographic characteristics and prehypertension and hypertension

Table 6 shows the bivariate association between students' socio-demographic characteristics, prehypertension and hypertension. There was a significant association between age, sex and prehypertension (p-value <0.05). Furthermore, there was a statistically significant association (p-value <0.05) between body weight (overweight and obesity) and prehypertension, as a higher percentage of students that were overweight and obese, had prehypertension (45.9%) compared to normal and underweight students (35.6%).

Similar findings were observed for hypertension. Over the ten years, there was a significant association between age and hypertension (p-value <0.05). The percentage of students with hypertension increased with age such that those over 41 years had the most cases of hypertension (29.0%), unlike those aged 16–20 years (5.0%). Male students were also more hypertensive (11.2%) compared to their female counterparts (4.8%), and this difference was statistically

**Table 3. Medical history and obesity-related disease profile of students attending the University of Ibadan health centre from 2009–2018.**

| Variables                                                    | Frequency | Percentage |
|--------------------------------------------------------------|-----------|------------|
| <b>Family History of Hypertension</b>                        |           |            |
| Yes                                                          | 3416      | 4.3        |
| No                                                           | 56187     | 95.7       |
| <b>Family History of Diabetes</b>                            |           |            |
| Yes                                                          | 2548      | 4.3        |
| No                                                           | 57051     | 95.7       |
| <b>Hypertension</b>                                          |           |            |
| Cases at entry                                               | 4851      | 96.4       |
| New cases at the clinic visit                                | 183       | 3.6        |
| <b>Hypertension cases on follow-up treatment (n = 5034)</b>  |           |            |
| Yes                                                          | 546       | 10.9       |
| No                                                           | 4488      | 89.1       |
| <b>Diabetes</b>                                              |           |            |
| Yes                                                          | 48        | 0.1        |
| No                                                           | 60115     | 99.9       |
| <b>Diabetes cases on follow-up treatment (n = 48)</b>        |           |            |
| Yes                                                          | 44        | 91.7       |
| No                                                           | 4         | 8.3        |
| <b>Dyslipidemia</b>                                          |           |            |
| Yes                                                          | 7         | 0.0        |
| No                                                           | 60156     | 100.0      |
| <b>Asthma</b>                                                |           |            |
| Yes                                                          | 432       | 0.7        |
| No                                                           | 59530     | 99.8       |
| <b>Asthma cases on follow-up treatment (n = 432)</b>         |           |            |
| Yes                                                          | 423       | 97.9       |
| No                                                           | 9         | 2.1        |
| <b>Gallstone</b>                                             |           |            |
| Yes                                                          | 6         | 0.0        |
| No                                                           | 60157     | 100.0      |
| <b>Osteoarthritis</b>                                        |           |            |
| Yes                                                          | 26        | 0.0        |
| No                                                           | 60137     | 100.0      |
| <b>Pre-hypertension (denominator excludes hypertensives)</b> |           |            |
|                                                              | 20959     | 35.1       |
| <b>Multiple HTN risk factors</b>                             |           |            |
|                                                              | 1315      | 2.2        |
| <b>Chest x-ray</b>                                           |           |            |
| Normal                                                       | 59430     | 99.5       |
| Abnormal                                                     | 302       | 0.5        |
| <b>ECG (n = 282, 5.6%)</b>                                   |           |            |
| Normal                                                       | 72        | 25.5       |
| Abnormal (LVH)                                               | 210       | 74.5       |

<https://doi.org/10.1371/journal.pone.0283210.t003>

significant ( $p$ -value $<0.05$ ). More postgraduate students (10.4%) had hypertension compared to undergraduate students (6.0%), and the difference was statistically significant ( $p$ -value $<0.05$ ). There is a significant association ( $p$ -value  $<0.05$ ) between body weight (overweight and obesity) and hypertension, as a higher percentage of students that were overweight and obese, were hypertensive (14.2%) compared to normal and underweight students (5.9%).



**Table 4. Bivariate analysis showing the association between socio-demographic characteristics of students and overweight & obesity.**

| Variables        | Overweight & Obese |              | $\chi^2$ | p-value |
|------------------|--------------------|--------------|----------|---------|
|                  | Yes (%)            | No (%)       |          |         |
| <b>Age-group</b> |                    |              |          |         |
| 16–20 years      | 3298 (14.0)        | 20244 (86.0) |          |         |
| 21–25 years      | 3278 (22.3)        | 11406 (77.7) | 6321.219 | 0.001   |
| 26–30 years      | 3582 (31.2)        | 7900 (68.8)  |          |         |
| 31–35 years      | 2039 (43.6)        | 2635 (56.4)  |          |         |
| 36–40 years      | 1437 (54.8)        | 1187 (45.2)  |          |         |
| 41+              | 1884 (66.4)        | 955 (33.6)   |          |         |
| <b>Sex</b>       |                    |              |          |         |
| Male             | 6545 (21.2)        | 24282 (78.8) | 730.243  | 0.001   |
| Female           | 8980 (30.6)        | 20067 (69.4) |          |         |
| <b>Programme</b> |                    |              |          |         |
| Undergraduate    | 4674 (15.0)        | 26458 (85.0) | 4023.587 | 0.001   |
| Postgraduates    | 10851 (37.8)       | 17891 (62.2) |          |         |

<https://doi.org/10.1371/journal.pone.0283210.t004>

The odds of prehypertension increased with age; students aged 41 years and above were three times more likely to have prehypertension than those aged 16–20 years (OR = 2.17, CI:1.94–2.43), and male students were more likely to have prehypertensive compared to females (OR = 2.40, CI:2.34–2.52).

Similarly, the odds of hypertension increased with age such that students aged 41 years and above were seven times as likely as those aged 16–20 years to have hypertension (OR = 6.11, CI: 5.29–7.06). Female students were less likely to be hypertensive (OR = 0.38, CI: 0.36–0.42) than their male counterparts. Overweight/obesity was also associated with a higher risk of hypertension (OR = 2.25, CI: 2.10–2.41) [Table 7].

## Discussion

This study identified the burden of overweight and obesity and associated risk factors for chronic, non-communicable diseases among adolescents, young and older adults. The data depicts the profile of a large population of students admitted into UI from secondary schools

**Table 5. Multivariate analysis showing the association between socio-demographic characteristics of students with overweight and obesity.**

| Variables        | Odd-ratio | p-value | 95%Confidence Interval (Odd ratio) |       |
|------------------|-----------|---------|------------------------------------|-------|
|                  |           |         | Lower                              | Upper |
| <b>Age-group</b> |           |         |                                    |       |
| 16–20 years      | ref       |         |                                    |       |
| 21–25 years      | 1.30      | 0.001   | 1.21                               | 1.39  |
| 26–30 years      | 1.94      | 0.001   | 1.78                               | 2.11  |
| 31–35 years      | 3.39      | 0.001   | 3.08                               | 3.74  |
| 36–40 years      | 5.27      | 0.001   | 4.72                               | 5.89  |
| 41+              | 8.96      | 0.001   | 8.01                               | 10.02 |
| <b>Sex</b>       |           |         |                                    |       |
| Male             | ref       |         |                                    |       |
| Female           | 2.12      | 0.001   | 2.04                               | 2.21  |
| <b>Programme</b> |           |         |                                    |       |
| Undergraduate    | ref       |         |                                    |       |
| Post-graduate    | 1.63      | 0.001   | 1.52                               | 1.75  |

<https://doi.org/10.1371/journal.pone.0283210.t005>

**Table 6. Bivariate analysis showing the association between socio-demographic characteristics of students and pre-hypertension and hypertension.**

| Variables                     | Pre-hypertension |              | $\chi^2$ | p-value | Hypertension |              | $\chi^2$ | p-value |
|-------------------------------|------------------|--------------|----------|---------|--------------|--------------|----------|---------|
|                               | Yes (%)          | No (%)       |          |         | Yes (%)      | No (%)       |          |         |
| <b>Age-group</b>              |                  |              |          |         |              |              |          |         |
| 16–20 years                   | 7945 (35.7)      | 14312 (64.3) | 449.17   | 0.001   | 1169 (5.0)   | 22285 (95.0) | 2391.217 | 0.001   |
| 21–25 years                   | 5118 (37.4)      | 8558 (62.6)  |          |         | 942 (6.4)    | 13698 (93.6) |          |         |
| 26–30 years                   | 3922 (37.3)      | 6584 (62.7)  |          |         | 925 (8.1)    | 10534 (91.9) |          |         |
| 31–35 years                   | 1702 (41.2)      | 2430 (58.8)  |          |         | 534 (11.4)   | 4151 (88.6)  |          |         |
| 36–40 years                   | 1042 (48.6)      | 1103 (51.4)  |          |         | 451 (17.2)   | 2173 (82.8)  |          |         |
| 41+                           | 1116 (56.1)      | 874 (43.9)   |          |         | 828 (29.0)   | 2026 (71.0)  |          |         |
| <b>Sex</b>                    |                  |              |          |         |              |              |          |         |
| Male                          | 13007 (47.8)     | 14198 (52.2) | 2200.2   | 0.001   | 3457 (11.2)  | 27313 (88.8) | 825.462  | 0.001   |
| Female                        | 7838 (28.5)      | 19663 (71.5) |          |         | 1394 (4.8)   | 27581 (95.2) |          |         |
| <b>Programme</b>              |                  |              |          |         |              |              |          |         |
| Undergraduate                 | 11014 (37.9)     | 18088 (62.1) | 1.748    | 0.186   | 1861 (6.0)   | 29174 (94.0) | 396.201  | 0.001   |
| Postgraduates                 | 9831 (38.4)      | 15773 (61.6) |          |         | 2990 (10.4)  | 25720 (89.6) |          |         |
| <b>Overweight &amp; Obese</b> |                  |              |          |         |              |              |          |         |
| Yes                           | 6043 (45.9)      | 7114 (54.1)  | 454.05   | 0.001   | 2193 (14.2)  | 13244 (85.8) | 1056.767 | 0.001   |
| No                            | 14724 (35.6)     | 26665 (64.4) |          |         | 2613 (5.9)   | 41489 (94.1) |          |         |
| <b>Family history of HTN</b>  |                  |              |          |         |              |              |          |         |
| Yes                           | 1174 (40.2)      | 1748 (59.8)  | 5.946    | 0.015   | 464 (13.7)   | 2922 (86.3)  | 130.36   | 0.001   |
| No                            | 19449 (37.9)     | 31832 (62.1) |          |         | 4516 (8.1)   | 51281 (91.9) |          |         |

<https://doi.org/10.1371/journal.pone.0283210.t006>

**Table 7. Multivariate analysis showing the association between socio-demographic characteristics of students and prehypertension and hypertension.**

|                                 | Prehypertension |         |                                    |       | Hypertension |         |                                    |       |
|---------------------------------|-----------------|---------|------------------------------------|-------|--------------|---------|------------------------------------|-------|
|                                 | Odds-ratio      | p-value | 95%Confidence Interval (Odd ratio) |       | Odds-ratio   | p-value | 95%Confidence Interval (Odd ratio) |       |
|                                 |                 |         | Lower                              | Upper |              |         | Lower                              | Upper |
| <b>Age-group</b>                |                 |         |                                    |       |              |         |                                    |       |
| 16–20 years                     | Ref             |         |                                    |       | Ref          |         |                                    |       |
| 21–25 years                     | 1.24            | 0.001   | 1.18                               | 1.32  | 1.42         | 0.001   | 1.28                               | 1.57  |
| 26–30 years                     | 1.19            | 0.001   | 1.10                               | 1.28  | 1.68         | 0.001   | 1.648                              | 1.91  |
| 31–35 years                     | 1.30            | 0.001   | 1.18                               | 1.42  | 2.21         | 0.001   | 1.91                               | 2.56  |
| 36–40 years                     | 1.73            | 0.001   | 1.55                               | 1.93  | 3.38         | 0.001   | 2.89                               | 3.95  |
| 41+                             | 2.17            | 0.001   | 1.94                               | 2.43  | 6.11         | 0.001   | 5.29                               | 7.06  |
| <b>Sex</b>                      |                 |         |                                    |       |              |         |                                    |       |
| Male                            | 2.40            | 0.001   | 2.34                               | 2.52  | 2.53         | 0.001   | 2.37                               | 2.71  |
| Female                          | Ref             |         |                                    |       | Ref          |         |                                    |       |
| <b>Programme</b>                |                 |         |                                    |       |              |         |                                    |       |
| Undergraduate                   | Ref             |         |                                    |       | Ref          |         |                                    |       |
| Postgraduates                   | 0.72            | 0.001   | 0.68                               | 0.76  | 0.75         | 0.001   | 0.67                               | 0.83  |
| <b>Overweight &amp; Obesity</b> |                 |         |                                    |       |              |         |                                    |       |
| No                              | Ref             |         |                                    |       | Ref          |         |                                    |       |
| Yes                             | 1.75            | 0.001   | 1.67                               | 1.83  | 2.25         | 0.001   | 2.10                               | 2.41  |
| <b>Family history of HTN</b>    |                 |         |                                    |       |              |         |                                    |       |
| Yes                             | 1.14            | 0.001   | 1.05                               | 1.23  | 1.63         | 0.001   | 1.47                               | 1.83  |
| No                              | Ref             |         |                                    |       | Ref          |         |                                    |       |

<https://doi.org/10.1371/journal.pone.0283210.t007>

and postgraduate students from tertiary institutions in different states and regions of Nigeria, and also from Africa. Hence the data reflects a nationally diverse population of adolescents and young adults in Nigeria and some African countries.

### The burden of overweight and obesity

In this study, the prevalence of overweight and obesity was 18.7 and 7.2%, respectively. Similar studies conducted to determine the prevalence of overweight and obesity in Nigerian universities recorded prevalence rates of 16.2% and 4.8% [33] and 25% and 11% [34], respectively. This finding aligns with the overall prevalence of overweight and obesity in a multi-centre study among LMICs, including Nigeria, which was 22% and 5.8% [12], and in Ghana, 25.8% and 5.9%, respectively [35]. In this study, overweight and obesity had significant relationships with the older age group, being female and undergoing postgraduate training.

We found a consistently increasing trend of overweight and obesity with age, which persists significantly in the consecutive admission cohorts, suggesting an increased risk of obesity till middle age and later in adulthood. The result of our study aligns with the findings from the global study of overweight and obesity in children and adults, which showed that in both developed and developing countries, the successive cohort from 1980 to 2013 tend to gain weight at all ages, and the most rapid weight gains occurred between the ages of 20 and 40 years [36]. This indicates that without any decisive policy and interventions to tackle overweight and obesity in adolescents and young adults in developing countries, including Nigeria [29], it is unlikely that the natural course of obesity will change or be different from the pattern observed elsewhere. Where exposure to an obesogenic environment is the norm, abnormal weight gain persists, and underweight students are also at risk of transitioning to overweight and obesity across the life course.

### Double burden of malnutrition

Our findings revealed a double burden of malnutrition characterised by the co-occurrence of undernutrition and overweight and obesity. While there was a rising trend in the underweight status of the participants as the year of entry increased, there was a shift from underweight to overnutrition (overweight and obesity) across each year of admission to the University. In this study, females had a higher burden of abnormal BMI with co-occurrence of underweight, overweight and obesity, similar to studies reported in other LMICs [37, 38]. The double burden of malnutrition documented in this study is similar to findings reported among students of tertiary institutions in different geopolitical regions of Nigeria [34, 39] and other LMICs [12]. The occurrence of a double burden of malnutrition, as found in this study, reflects the Nigerian population and many developing countries experiencing nutrition and socio-economic transitions [40–42]. This strongly implies that environmental, nutritional and socio-economic variables rather than genetic factors are likely responsible for the ongoing dramatic double burden of malnutrition in LMICs.

The double burden of malnutrition is a complex and vital phenomenon because of the relationship and biological link between the diverse forms of malnutrition beyond coexistence. The increased prevalence of underweight in this study is worrisome because low BMI may be a risk factor for CVD and all-cause mortality [43–45]. Childhood undernutrition is associated with long-term increased susceptibility to fat accumulation mostly in the central region of the body, lower fat oxidation, lower resting and postprandial energy expenditure, insulin resistance and a higher risk of diabetes, hypertension and dyslipidaemia in adulthood [46]. At the same time, undernutrition in the form of nutritional deficiencies is an important underlying risk factor for major infectious diseases and global child mortality [47, 48]. Thus, the double burden of malnutrition at a younger age is a silent driver of the double burden of infectious

and non-communicable diseases [47]. Future medical screening in UI can provide more useful data about the dynamics and effects of the dual burden of malnutrition if the diets and nutritional status of the students are explored together with additional indices of adiposity. The link between CVD risk, underweight, and other forms of malnutrition, including micronutrient deficiencies in young adults, also needs further examination.

### Obesity-related health conditions

Hypertension was the most prevalent chronic condition among the study participants. Its prevalence was 8.1%, consistent with a study conducted among Ethiopian students, where the prevalence was 7.4% [49]. Studies indicate that 90% of adolescents and young adults with hypertension have primary or essential hypertension, with no specific cause but well-defined risk factors [50–52]. In this study, hypertension had significant relationships with the older age group, being male, undergoing postgraduate study, overweight or obese, and having a family history of hypertension. As overweight and obesity rates increased among the study population, there was a parallel rise in the prevalence of hypertension across the age groups. A similar finding has been documented among students of a tertiary institution in Cameroon [53].

Hypertension is the leading cause of death globally and the most important risk factor for cardiovascular disease, stroke, and chronic kidney disease (CKD) [32, 54]. Left ventricular hypertension (LVH) is one of the early manifestations and immediate consequences of hypertension [55, 56]. Available evidence shows that adolescents and young adults with hypertension have similar target-organ damage such as LVH, microalbuminuria and carotid intimal thickness as older adults with hypertension [57]. This study shows that only 5.6% of the study participants had an Electrocardiography (ECG) done for the evaluation of hypertension-related target-organ damage. The ECG of about three-quarters of those evaluated revealed LVH. This finding has limited usefulness and must be interpreted with caution given the relatively small proportion of the participants who had ECG and that ECG is not validated for the diagnosis of LVH in young individuals [58]. However, LVH indicates an increased risk for future cardiovascular disease. Also, the presence of LVH in adolescents and young adults with high BMI has been implicated in sudden cardiac death (SCD) [59–61]. After adjusting for age and blood pressure, the body-mass index remained a strong independent predictor of left ventricular mass, ventricular wall thickness, and left ventricular internal dimension [62, 63]. In this study, however, there was no information on the likely impact of excess body weight on LV geometry and function as this could only be assessed by imaging. LVH and other target organ markers are associated with adverse cardiovascular outcomes and risks for chronic diseases [50, 52]. Unfortunately, these complications and consequences are unlikely to be clinically apparent for many years in adolescence and young adulthood. Thus, there is a need to adapt and follow recommended guidelines for investigating and managing hypertension and co-morbidities in adolescents and young adults with abnormal BMI.

Also, our study revealed that a third of the study population (35.1%) had prehypertension. Reports from many studies indicate that prehypertension is common among adolescents and young adults, with evidence of target organ damage already present [64, 65]. Prehypertension is not considered a disease category but identifies those likely to progress to stage 1 or 2 hypertension in the future [66, 67], without intervention. It is a strong predictor of hypertension and future cardiovascular disease [68, 69]. As found in this study, the significant relationship between prehypertension and being overweight and obese implies that the burden of hypertension and cardiovascular disease may increase if the obesity epidemic continues to spiral out of control.

We found that only about a tenth of those who met the criteria for a hypertension diagnosis had records of any follow-up intervention or treatment. This is discouraging but may not be

unconnected with poor documentation and challenges associated with secondary health data. Furthermore, unlike asthma and diabetes which usually manifest with acute symptoms, hypertension is largely asymptomatic, and this may also have negatively influenced the health-seeking behaviour of the study participants. Existing studies reveal that hypertension diagnosis rates are lower, treatment is often delayed, and that control is lower in young people than in adults due to multiple factors [70–72]. Untreated hypertension in adolescents and young adults increases the risk of cardiovascular events in middle age [73]. It also contributes to an earlier onset of coronary heart disease, heart failure, stroke, and transient ischemic attacks [74].

Our findings underscore four crucial points. First, the burgeoning prevalence and pattern of overweight and obesity across the age groups from different locations suggest a strong environmental/social causative factor deserving further attention as possible targets for intervention. Second, the evidence indicates the need to implement lifestyle-related interventions as part of efforts to halt the progression of obesity and prevent the emergence of chronic diseases. Third, overweight or obesity and chronic disease risks, especially cardiovascular disease, and its potential complications, were under-assessed. The resulting underestimation may further contribute to the perception of a low-risk profile for cardiovascular disease among adolescents and young adults. Fourth, greater success may be achieved in curbing malnutrition if the existing environmental, socioeconomic, and cultural factors, including gender-specific variations, are explored further for appropriate interventions. The double burden of malnutrition offers a unique and vital opportunity for integrated action on malnutrition in all its forms. According to WHO, there is an urgent need for double-duty actions, “which are interventions, programmes, and policies that have the potential to simultaneously reduce the risk and burden of under and overnutrition” [5, 63] in the education sector.

### Implications for interventions

Primary prevention remains the most realistic strategy to curb the growing burden of obesity and obesity-related health conditions among adolescents and young adults. This is pertinent considering that overweight/obesity and related health conditions documented in some adolescents and young adults in this study predate their entry to the university. Unfortunately, systematic reviews of studies have reported gaps in the number and quality of obesity prevention interventions conducted within the adolescent and young adult age groups in developing countries [75, 76]. Adolescents and young adults represent a unique age group whose views and health needs are not adequately addressed by the health management information system. For instance, there was apparent neglect of adolescents (*except for married female adolescents*) during the collection of national data on nutrition during the Nigeria Demographic Health Surveys [40]. In addition, policies and programmes to address nutrition in Nigeria remain skewed towards undernutrition and children under five years [40, 77]. To tackle obesity among Nigerian adolescents and young adults, a critical step is the collection of data on its burden, risk factors and trends. Furthermore, there is a need for a holistic, synergistic mix of population-level interventions such as educational interventions, the provision of physical activity facilities, coupled with the regulation of labelling, marketing, content and pricing of energy-dense foods and sugar-sweetened beverages, which target the obesogenic environment and requires a multi-sectoral approach [77, 78].

### Strength and limitation of the study

The strengths of this study include the large population of adolescents and young adults from diverse geographical and social backgrounds as participants. Population-based studies on obesity and emerging NCD risks are needed to build an evidence base that socially and culturally

reflects the realities in developing countries. Hitherto, studies on obesity and overweight problems in Nigerian tertiary institutions were mainly conducted on undergraduate students. However, this study included undergraduate and postgraduate students covering a broad spectrum of adolescents and young and middle-aged adults. Furthermore, the study spans a ten-year period showing the trajectory of obesity and hypertension prevalence. The findings from this study will add to the body of knowledge on the burden of obesity and overweight among university students in Nigeria and other developing countries, which will assist in planning effective health intervention programmes to reduce the heavy burden of obesity noted among university students.

The limitations of this study include a lack of data on dietary intake, physical activity, socioeconomic status, smoking, alcohol consumption, and other emerging lifestyle risk factors for obesity and overweight, which could have provided a richer perspective on the factors contributing to the burden of obesity and associated diseases among this population. The study described a single-centre experience in Nigeria, the results may not apply to the general population of young adults in Africa. However, this study provides additional information on the chronic disease risks associated with higher BMI in young adults and the implication of the dual burden of malnutrition to the increasing prevalence of NCDs. It provides a large database for university managers to launch integrated public health interventions for malnutrition and NCDs at a crucial time in the life of adolescents and young adults.

## Conclusion

This study has identified the burden of double malnutrition, rising trends in the prevalence of overweight/obesity among students in a tertiary institution and the emergence of chronic disease risks with lifelong implications on their health and a concomitant burden on the health system. Evidence-based, cost-effective interventions are urgently needed at the secondary and tertiary-level educational institutions to address the growing burden of malnutrition and chronic disease risks among the adolescent and young adult population. These interventions must be holistic and transcend obesity awareness programmes to include those which target the obesogenic physical and policy environments and empower adolescents and young adults to adopt appropriate healthy behaviours.

## Acknowledgments

AOO is grateful to The Royal Tropical Institute (KIT), Amsterdam, the Netherlands, which provided training on the 'Control Strategies for Communicable and Non-communicable Diseases' through the Orange knowledge Scholarship. Also, the Bernard Lown Scholars Program, Harvard T. Chan School of Public Health, provided Fellowship training in Cardiovascular Disease Prevention and support to AOO for the conduct of this study. A special appreciation goes to the 12th Vice-Chancellor of the University of Ibadan, Prof. Abel Idowu Olayinka, who provided institutional support to AOO for capacity building and the conduct of the study.

## Author Contributions

**Conceptualization:** Abayomi Olabayo Oluwasanu.

**Data curation:** Abayomi Olabayo Oluwasanu, Joshua Odunayo Akinyemi, Mojisola Morenike Oluwasanu, Olusola Lanre Oladoyinbo.

**Formal analysis:** Abayomi Olabayo Oluwasanu, Joshua Odunayo Akinyemi, Mojisola Morenike Oluwasanu.

**Funding acquisition:** Abayomi Olabayo Oluwasanu.

**Methodology:** Abayomi Olabayo Oluwasanu, Joshua Odunayo Akinyemi, Mojisola Morenike Oluwasanu.

**Project administration:** Abayomi Olabayo Oluwasanu.

**Resources:** Abayomi Olabayo Oluwasanu.

**Supervision:** Abayomi Olabayo Oluwasanu, Ademola Johnson Ajuwon, Ayodele Samuel Jegede, Goodarz Danaei.

**Validation:** Joshua Odunayo Akinyemi, Ademola Johnson Ajuwon, Ayodele Samuel Jegede, Goodarz Danaei.

**Writing – original draft:** Abayomi Olabayo Oluwasanu.

**Writing – review & editing:** Abayomi Olabayo Oluwasanu, Joshua Odunayo Akinyemi, Mojisola Morenike Oluwasanu, Olabisi Bada Oseghe, Olusola Lanre Oladoyinbo, Jelili Bello, Ademola Johnson Ajuwon, Ayodele Samuel Jegede, Goodarz Danaei, Olufemi Akingbola.

## References

1. Eckel RH, York DA, Rössner S, Hubbard V, Caterson I, St. Jeor ST, et al. Prevention Conference VII: Obesity, a worldwide epidemic related to heart disease and stroke: executive summary. *Circulation*. 2004 Nov 2; 110(18):2968–75. <https://doi.org/10.1161/01.CIR.0000140086.88453.9A> PMID: 15520336
2. World Health Organization. Obesity and Overweight. 2020. <https://www.who.int/news-room/fact-sheets/detail/obesity-and-overweight>. Accessed 22/05/2020.
3. Chhatwal J, Verma M, Riar SK. Obesity among pre-adolescent and adolescents of a developing country (India). *Asia Pacific Journal of clinical nutrition*. 2004 Sep 1; 13(3). PMID: 15331333
4. Wang Y, Lobstein TI. Worldwide trends in childhood overweight and obesity. *International journal of pediatric obesity*. 2006 Jan 1; 1(1):11–25. <https://doi.org/10.1080/17477160600586747> PMID: 17902211
5. WHO. The double burden of malnutrition: policy brief. Geneva; 2017, p. 10. Report No.: WHO/NMH/NHD/17.3. <http://www.who.int/nutrition/publications/doubleburdenmalnutrition-policybrief/en/>
6. Mirmiran P, Mirbolooki M, Azizi F. Familial clustering of obesity and the role of nutrition: Tehran Lipid and Glucose Study. *International journal of obesity*. 2002 Dec; 26(12):1617–22. <https://doi.org/10.1038/sj.ijo.0802120> PMID: 12461678
7. Vadeboncoeur C, Foster C, Townsend N. Freshman 15 in England: a longitudinal evaluation of first-year university student's weight change. *BMC obesity*. 2016 Dec 1; 3(1):45.
8. Sa J, Cho BY, Chaput JP, Chung J, Choe S, Gazmararian JA, et al. Sex and racial/ethnic differences in the prevalence of overweight and obesity among US college students, 2011–2015. *Journal of American College Health*. 2019 Oct 31:1–9.
9. Nwachukwu DC, Nwagha U, Obikili EN, Ejezie FE, Okwuosa CN, Nweke ML, et al. Assessment of body mass index and blood pressure among university students in, Enugu, South East, Nigeria. *Nigerian Journal of Medicine*. 2010; 19(2). <https://doi.org/10.4314/njm.v19i2.56503> PMID: 20642078
10. Ejike CE, Ijeh II. Obesity in young-adult Nigerians: variations in prevalence determined by anthropometry and bioelectrical impedance analysis, and the development of % body fat prediction equations. *International Archives of Medicine*. 2012 Dec 1; 5(1):22. PMID: 22818201
11. Cilliers J, Senekal M, Kunneke E. The association between the body mass index of first-year female university students and their weight-related perceptions and practices, psychological health, physical activity and other physical health indicators. *Public Health Nutrition*. 2006 Apr; 9(2):234–43. <https://doi.org/10.1079/phn2005846> PMID: 16571178
12. Peltzer K, Pengpid S, Samuels T, Özcan NK, Mantilla C, Rahamefy OH, et al. Prevalence of overweight/obesity and its associated factors among university students from 22 countries. *International journal of environmental research and public health*. 2014 Jul; 11(7):7425–41. <https://doi.org/10.3390/ijerph110707425> PMID: 25050651
13. Seo DC, Torabi MR, Jiang N, Fernandez-Rojas X, Park BH. Correlates of college students' physical activity: cross-cultural differences. *Asia Pacific Journal of Public Health*. 2009 Oct; 21(4):421–32. <https://doi.org/10.1177/1010539509344112> PMID: 19661101

14. Pengpid S, Peltzer K. Prevalence of overweight/obesity and central obesity and its associated factors among a sample of university students in India. *Obesity research & clinical practice*. 2014 Nov 1; 8(6): e558–70. <https://doi.org/10.1016/j.orcp.2013.12.003> PMID: 25434911
15. Gopalakrishnan S, Ganeshkumar P, Prakash MV, Amalraj V. Prevalence of overweight/obesity among the medical students, Malaysia. *The Medical Journal of Malaysia*. 2012 Aug 1; 67(4):442–4. PMID: 23082463
16. Boo NY, Chia GJ, Wong LC, Chew RM, Chong W, Loo RC. The prevalence of obesity among clinical students in a Malaysian medical school. *Singapore medical journal*. 2010 Feb 1; 51(2):126. PMID: 20358151
17. Singh AS, Mulder C, Twisk JW, Van Mechelen W, Chinapaw MJ. Tracking of childhood overweight into adulthood: a systematic review of the literature. *Obesity reviews*. 2008 Sep; 9(5):474–88. <https://doi.org/10.1111/j.1467-789X.2008.00475.x> PMID: 18331423
18. Patton GC, Coffey C, Carlin JB, Sawyer SM, Williams J, Olsson CA, et al. Overweight and obesity between adolescence and young adulthood: a 10-year prospective cohort study. *Journal of adolescent health*. 2011 Mar 1; 48(3):275–80. <https://doi.org/10.1016/j.jadohealth.2010.06.019> PMID: 21338899
19. Skinner AC, Mayer ML, Flower K, Weinberger M. Health status and health care expenditures in a nationally representative sample: how do overweight and healthy-weight children compare? *Pediatrics* 2008; 121:e269–e277. <https://doi.org/10.1542/peds.2007-0874> PMID: 18195001
20. Kernan WN, Dearborn JL. Obesity increases stroke risk in young adults: opportunity for prevention. *Stroke*. 2015; 46:1435–6. <https://doi.org/10.1161/STROKEAHA.115.009347> PMID: 25944321
21. Reilly JJ, Kelly J. Long-term impact of overweight and obesity in childhood and adolescence on morbidity and premature mortality in adulthood: systematic review. *International journal of obesity*. 2011 Jul; 35(7):891–8. <https://doi.org/10.1038/ijo.2010.222> PMID: 20975725
22. Gordon-Larsen P, The NS, Adair LS. Longitudinal trends in obesity in the United States from adolescence to the third decade of life. *Obesity*. 2010 Sep; 18(9):1801–4. <https://doi.org/10.1038/oby.2009.451> PMID: 20035278
23. Butler SM, Black DR, Blue CL, Gretebeck RJ. Change in diet, physical activity, and body weight in female college freshman. *American journal of health behavior*. 2004 Jan 1; 28(1):24–32. <https://doi.org/10.5993/ajhb.28.1.3> PMID: 14977156
24. Ramalho AA, Dalamaria T, Souza OF. Regular consumption of fruits and vegetables by university students in Rio Branco, Acre State, Brazil: prevalence and associated factors. *Cadernos de Saúde Pública*. 2012 Jul; 28(7):1405–13.
25. El Ghazali S, Ibrahim JM, Kandari BM, Ismail NA. The relationship between lifestyle and body mass index among university students in Kuwait, Egypt. *J. Community Med*. 2010; 28(1):69–76.
26. Aucott L. Mental Well-Being Related To Lifestyle and Risky Behaviours in 18–25 Year Old: Evidence from North-East Scotland. *International Journal of Public Health Research*. 2014 Mar 1; 4(1):431–40.
27. El-Kassas G, Itani L, El Ali Z. Obesity risk factors among Beirut Arab University students in Tripoli-Lebanon. *Journal of Nutrition & Food Sciences*. 2015 Jan 1; 5(6):1.
28. Sparling PD. Obesity on campus. *Preventing chronic disease: Public health research, practice and policy*.
29. Poobalan A, Aucott L. Obesity among young adults in developing countries: a systematic overview. *Current obesity reports*. 2016 Mar 1; 5(1):2–13. <https://doi.org/10.1007/s13679-016-0187-x> PMID: 26883372
30. World Health Organization. Physical status: The use of and interpretation of anthropometry, Report of a WHO Expert Committee. World Health Organization; 1995.
31. Pickering TG, Hall JE, Appel LJ, Falkner BE, Graves J, Hill MN, et al. Recommendations for blood pressure measurement in humans and experimental animals: part 1: blood pressure measurement in humans: a statement for professionals from the Subcommittee of Professional and Public Education of the American Heart Association Council on High Blood Pressure Research. *Hypertension*. 2005 Jan 1; 45(1):142–61. <https://doi.org/10.1161/01.HYP.0000150859.47929.8e> PMID: 15611362
32. Chobanian AV. National heart, lung, and blood institute joint national committee on prevention, detection, evaluation, and treatment of high blood pressure; national high blood pressure education program coordinating committee: the seventh report of the joint national committee on prevention, detection, evaluation, and treatment of high blood pressure: the JNC 7 report. *Jama*. 2003; 289:2560–72.
33. Gwarzo IM, Adam MN, Wali NY, Ibrahim SA. Correlation of anthropometric indices with fasting blood glucose and blood pressure among university students in Kano, Nigeria. *Nigerian Journal of Basic and Clinical Sciences*. 2020 Jul 1; 17(2):128.
34. Agwu EM, Draper S, Croix MD, Egimot-Nwadiaro R, Onuoha CR. Health rating, obesity and hypertension among university students in Nigeria by gender and ethnicity. *Public Health Int*. 2017 Sep 28; 2:131–43.



35. Mogre V, Nyaba R, Aleyira S. Lifestyle risk factors of general and abdominal obesity in students of the school of medicine and health science of the University of Development Studies, Tamale, Ghana. *International Scholarly Research Notices*. 2014; 2014. <https://doi.org/10.1155/2014/508382> PMID: 24649393
36. Ng M, Fleming T, Robinson M, Thomson B, Graetz N, Margono C, et al. Global, regional, and national prevalence of overweight and obesity in children and adults during 1980–2013: a systematic analysis for the Global Burden of Disease Study 2013. *The Lancet*. 2014 Aug 30; 384(9945):766–81. [https://doi.org/10.1016/S0140-6736\(14\)60460-8](https://doi.org/10.1016/S0140-6736(14)60460-8) PMID: 24880830
37. Zeba AN, Delisle HF, Renier G, Savadogo B, Baya B. The double burden of malnutrition and cardiometabolic risk widens the gender and socio-economic health gap: a study among adults in Burkina Faso (West Africa). *Public health nutrition*. 2012 Dec; 15(12):2210–9. <https://doi.org/10.1017/S1368980012000729> PMID: 22463806
38. Hanandita W, Tampubolon G. The double burden of malnutrition in Indonesia: Social determinants and geographical variations. *SSM-population health*. 2015 Dec 1; 1:16–25. <https://doi.org/10.1016/j.ssmph.2015.10.002> PMID: 29349117
39. Olusanya JO, Omotayo OA. Prevalence of obesity among undergraduate students of Tai Solarin University of Education, Ijagun, Ijebu-Ode. *Pak J Nutr*. 2011; 10(10).
40. National Population Commission/Nigeria and ICF, 2019. Nigeria Demographic and Health Survey 2018 Key Indicators Report. Abuja, Nigeria, and Rockville, Maryland, USA Retrieved on 15<sup>th</sup> October, 2020 from <https://www.dhsprogram.com/pubs/pdf/FR359/FR359.pdf>
41. Doak CM, Adair LS, Bentley M, Monteiro C, Popkin BM. The dual burden household and the nutrition transition paradox. *Int J Obes*. 2005; 29:129–136. <https://doi.org/10.1038/sj.jco.0802824> PMID: 15505634
42. Popkin BM, Adair LS, Ng SW. Global nutrition transition and the pandemic of obesity in developing countries. *Nutrition reviews*. 2012 Jan 1; 70(1):3–21. <https://doi.org/10.1111/j.1753-4887.2011.00456.x> PMID: 22221213
43. Park D, Lee JH, Han S. Underweight: another risk factor for cardiovascular disease?: a cross-sectional 2013 Behavioral Risk Factor Surveillance System (BRFSS) study of 491,773 individuals in the USA. *Medicine*. 2017 Dec; 96(48). <https://doi.org/10.1097/MD.00000000000008769> PMID: 29310352
44. Kwon H, Yun JM, Park JH, Cho BL, Han K, Joh HK, et al. Incidence of cardiovascular disease and mortality in underweight individuals. *Journal of cachexia, sarcopenia and muscle*. 2021 Apr; 12(2):331–8. <https://doi.org/10.1002/jcsm.12682> PMID: 33619889
45. Kim HJ., Kim B.S., Lee J.H. et al. Impact of underweight on 3-year all-cause mortality in patients with acute severe hypertension: a retrospective cohort study. *Sci Rep* 12, 4798 (2022). <https://doi.org/10.1038/s41598-022-08892-9> PMID: 35314748
46. Martins VJ, Toledo Florêncio TM, Grillo LP, Franco MD, Martins PA, Clemente AP, et al. Long-lasting effects of undernutrition. *International journal of environmental research and public health*. 2011 Jun; 8(6):1817–46. <https://doi.org/10.3390/ijerph8061817> PMID: 21776204
47. Kolčić I. Double burden of malnutrition: A silent driver of double burden of disease in low- and middle-income countries. *Journal of global health*. 2012 Dec; 2(2). <https://doi.org/10.7189/jogh.02.020303> PMID: 23289074
48. Black RE, Allen LH, Bhutta Z, Caulfield LE, de Onis M, Ezzati M, et al. Maternal and child undernutrition: global and regional exposures and health consequences. *Lancet*. 2008; 371:243–60. [https://doi.org/10.1016/S0140-6736\(07\)61690-0](https://doi.org/10.1016/S0140-6736(07)61690-0) PMID: 18207566
49. Tadesse and Alemu: Hypertension and associated factors among university students in Gondar, Ethiopia: a cross sectional study, *BMC Public Health*, 2014, 14:937. <https://doi.org/10.1186/1471-2458-14-937> PMID: 25201163
50. Drukteinis J, Roman M, Fabsitz R, et al. Cardiac and systemic hemodynamic characteristics of hypertension and prehypertension in adolescents and young adults: The Strong Heart Study. *Circulation* 2006; 115(2):221–227.
51. Flynn JT. Hypertension in children. In: Kaplan N, ed. *Kaplan's Clinical Hypertension*. 9th ed. Philadelphia: Lippincott Williams and Wilkins, 2006.
52. Assadi F. The growing epidemic of hypertension among children and adolescents: A challenging road ahead. *Pediatr Cardiol* 2012; 33(7):1013–1020. <https://doi.org/10.1007/s00246-012-0333-5> PMID: 22565200
53. Choukem SP, Kengne AP, Nguéfac ML, Mboue-Djeka Y, Nebongo D, Guimezap JT, et al. Four-year trends in adiposity and its association with hypertension in serial groups of young adult university students in urban Cameroon: a time-series study. *BMC Public Health*. 2017 Dec; 17(1):1–6.
54. National High Blood Pressure Education Program Working Group on High Blood Pressure in C, Adolescents. The fourth report on the diagnosis, evaluation, and treatment of high blood pressure in children and adolescents. *Pediatrics*. 2004; 114.

55. Lozano JV, Redón J, Cea-Calvo L, Fernández-Pérez C, Navarro J, Bonet Á, et al. Left ventricular hypertrophy in the Spanish hypertensive population. The ERIC-HTA study. *Revista Española de Cardiología (English Edition)*. 2006 Feb 1; 59(2):136–42.
56. Diamond JA, Phillips RA. Hypertensive heart disease. *Hypertension research*. 2005 Mar; 28(3):191–202. <https://doi.org/10.1291/hypres.28.191> PMID: 16097361
57. Tirosch A, Afek A, Rudich A, Percik R, Gordon B, Ayalon N, et al. Progression of normotensive adolescents to hypertensive adults: a study of 26 980 teenagers. *Hypertension*. 2010 Aug 1; 56(2):203–9. <https://doi.org/10.1161/HYPERTENSIONAHA.109.146415> PMID: 20547973
58. Hancock E, Deal B, Mirvis D, Okin P, Kligfield P, Gettes L. AHA/ACCF/HRS Recommendations for the Standardization and Interpretation of the Electrocardiogram: Part V: Electrocardiogram Changes Associated With Cardiac Chamber Hypertrophy. *Circulation* 2009; 119(10):e251–e261.
59. Finocchiaro G, Papadakis M, Dhutia H, Cole D, Behr ER, Tome M, et al. Obesity and sudden cardiac death in the young: Clinical and pathological insights from a large national registry. *European journal of preventive cardiology*. 2018 Mar 1; 25(4):395–401. <https://doi.org/10.1177/2047487317751291> PMID: 29319343
60. Leowattana W. Obesity and acute cardiovascular events. *European Journal of Preventive Cardiology*. 2018 Apr 1; 25(6):618–20.
61. Aune D, Schlesinger S, Norat T, Riboli E. Body mass index, abdominal fatness, and the risk of sudden cardiac death: a systematic review and dose–response meta-analysis of prospective studies. *European journal of epidemiology*. 2018 Aug; 33(8):711–22. <https://doi.org/10.1007/s10654-017-0353-9> PMID: 29417316
62. Lauer MS, Anderson KM, Kannel WB, Levy D. The Impact of Obesity on Left Ventricular Mass and Geometry: The Framingham Heart Study. *JAMA*. 1991; 266(2):231–236. <https://doi.org/10.1001/jama.1991.03470020057032>
63. Turkbey EB, McClelland RL, Kronmal RA, Burke GL, Bild DE, Tracy RP, et al. The impact of obesity on the left ventricle: the Multi-Ethnic Study of Atherosclerosis (MESA). *JACC: Cardiovascular Imaging*. 2010 Mar; 3(3):266–74. <https://doi.org/10.1016/j.jcmg.2009.10.012> PMID: 20223423
64. Redwine KM, Daniels SR. Prehypertension in adolescents: risk and progression. *The Journal of Clinical Hypertension*. 2012 Jun; 14(6):360–4. <https://doi.org/10.1111/j.1751-7176.2012.00663.x> PMID: 22672089
65. Redjala O, Sari-Ahmed M, Cherifi M, Smati L, Benhassine F, Baghriche M, et al. Children hypertension in Northern Africa. *American journal of cardiovascular disease*. 2021; 11(2):222. PMID: 34084657
66. Saseen J. Essential hypertension. In: Alldredge BK, Corelli RL, Ernst ME, Guglielmo BJ, Jacobson PA, Kradjan WA, Williams BR, editors. *Koda-Kimble and Young's Applied Therapeutics: The Clinical Use of Drugs*. 10th ed. Philadelphia: Lippincott Williams & Wilkins; c2013. Chapter 14.
67. Saseen JJ, MacLaughlin. Hypertension. In: DiPiro JT, Talbert RL, Yee GC, Matzke GR, Wells BG, Posey LM, editors. *Pharmacotherapy: A pathophysiologic approach*. 9th ed. New York: McGraw-Hill Medical; c2014. Chapter 3.
68. Mahadir Naidu B, Mohd Yusoff MF, Abdullah S, Musa KI, Yaacob NM, Mohamad MS, et al. Factors associated with the severity of hypertension among Malaysian adults. *PLoS One*. 2019; 14(1): e0207472. <https://doi.org/10.1371/journal.pone.0207472> PMID: 30605462
69. Qing-shan Lyu, Yin-ying Huang. The Relationship between Serum Total Bilirubin and Carotid Intima-Media Thickness in Patients with Pre-hypertension. *Annals of Clinical Laboratory Science*, 2018, 48 (6):757–763. PMID: 30610046
70. Daugherty SL, Masoudi FA, Ellis JL, Ho PM, Schmittiel JA, Tavel HM, et al. Age-dependent gender differences in hypertension management. *J Hypertens* 2011; 29:1005–1011. <https://doi.org/10.1097/HJH.0b013e3283449512> PMID: 21330934
71. Johnson HM, Thorpe CT, Bartels CM, Schumacher JR, Palta M, Pandhi N, et al. Antihypertensive medication initiation among young adults with regular primary care use. *Journal of general internal medicine*. 2014 May; 29(5):723–31. <https://doi.org/10.1007/s11606-014-2790-4> PMID: 24493322
72. Hinton TC, Adams ZH, Baker RP, Hope KA, Paton JF, Hart EC, et al. Investigation and treatment of high blood pressure in young people: too much medicine or appropriate risk reduction?. *Hypertension*. 2020 Jan; 75(1):16–22. <https://doi.org/10.1161/HYPERTENSIONAHA.119.13820> PMID: 31735086
73. Sundström J, Neovius M, Tynelius P, Rasmussen F. Association of blood pressure in late adolescence with subsequent mortality: cohort study of Swedish male conscripts. *BMJ*. 2011 Feb 22; 342. <https://doi.org/10.1136/bmj.d643> PMID: 21343202
74. Yano Y, Reis JP, Colangelo LA, Shimbo D, Viera AJ, Allen NB, et al. Association of blood pressure classification in young adults using the 2017 American College of Cardiology/American Heart Association blood pressure guideline with cardiovascular events later in life. *Jama*. 2018 Nov 6; 320(17):1774–82. <https://doi.org/10.1001/jama.2018.13551> PMID: 30398601

75. Klingberg S, Draper CE, Micklesfield LK, Benjamin-Neelon SE, van Sluijs EM. Childhood obesity prevention in africa: A systematic review of intervention effectiveness and implementation. *International journal of environmental research and public health*. 2019 Jan; 16(7):1212. <https://doi.org/10.3390/ijerph16071212> PMID: 30987335
76. Salam RA, Padhani ZA, Das JK, Shaikh AY, Hoodbhoy Z, Jeelani SM, et al. Effects of lifestyle modification interventions to prevent and manage child and adolescent obesity: a systematic review and meta-analysis. *Nutrients*. 2020 Aug; 12(8):2208. <https://doi.org/10.3390/nu12082208> PMID: 32722112
77. Oluwasanu M, Oladunni O, Oladepo O. Multisectoral approach and WHO 'Bestbuys' in Nigeria's nutrition and physical activity policies. *Health Promotion International*. 2020 Feb 22, 1–11. <https://doi.org/10.1093/heapro/daaa009> PMID: 32087010
78. Baker P, Gill T, Friel S, Carey G, Kay A. Generating political priority for regulatory interventions targeting obesity prevention: an Australian case study. *Social science & medicine*. 2017 Mar 1; 177:141–9. <https://doi.org/10.1016/j.socscimed.2017.01.047> PMID: 28161671
